# Supplementary material for: Duration of obesity exposure between ages 10 and 40 years and its relationship with cardiometabolic disease risk factors: A cohort study
Source: PLoS Med. 2020 Dec 8;17(12):e1003387. doi: 10.1371/journal.pmed.1003387 (PMC7723271; doi:10.1371/journal.pmed.1003387)
Supplement: S14 Table — (DOCX) [file pmed.1003387.s017.docx]

**Supplementary table S14.** **Association between ever obese and categories of obesity duration (vs never obese) and dichotomous cardiometabolic outcomes (imputed, adjusted for sex, cohort, age at follow-up, ethnicity, birth weight, childhood social class and obesity severity): limited to those who once obese were always obese**

|  | **Hypertensiona**  **(n=20697)**  *(ref=normotensive)* | | | **Low HDL-cholesterolb**  **(n=20697)**  *(ref=non-low)* | | | **Elevated HbA1cc**  **(n=20697)**  *(ref=non-elevated)* | | |
| --- | --- | --- | --- | --- | --- | --- | --- | --- | --- |
|  | No | Yes | RR  (95% CI) | No | Yes | RR  (95% CI) | No | Yes | RR  (95% CI) |
|  | *Model 1* | | | | | | | | |
| Obese |  | | |  | | |  | | |
| *Never (ref)* | 12675 | 5166 | - | 15378 | 2463 | - | 15609 | 2232 | - |
| Yes | 1542 | 1314 | 1.6 (1.5, 1.7) | 1841 | 1015 | 2.0 (1.9, 2.2) | 1917 | 939 | 2.2 (2.0, 2.4) |
|  | *Model 2* | | | | | | | | |
| Obesity duration |  | |  |  | |  |  | |  |
| *Never (ref)* | 12675 | 5166 | - | 15378 | 2463 | - | 15609 | 2232 | - |
| <5 years | 430 | 309 | 1.5 (1.4, 1.6) | 521 | 218 | 2.0 (1.8, 2.3) | 554 | 185 | 2.0 (1.8, 2.4) |
| 5-<10 years | 460 | 373 | 1.7 (1.5, 1.8) | 555 | 278 | 2.0 (1.8, 2.3) | 587 | 246 | 2.3 (2.0, 2.7) |
| 10-<15 years | 334 | 302 | 1.6 (1.4, 1.8) | 407 | 229 | 2.1 (1.8, 2.5) | 424 | 212 | 2.4 (2.1, 2.9) |
| 15-<20 years | 226 | 216 | 1.6 (1.3, 1.9) | 251 | 191 | 2.4 (2.0, 3.0) | 252 | 190 | 3.1 (2.5, 3.8) |
| 20-<30 years | 92 | 114 | 1.6 (1.2, 2.1) | 107 | 99 | 2.5 (1.8, 3.3) | 100 | 106 | 3.0 (2.2, 4.0) |
| *p(trend)* |  |  | 0.525 |  |  | 0.0.097 |  |  | 0.007 |

aHypertension: SBP/DBP≥140/90mmHg and/or on BP lowering medication; bLow-HDL: according to NCEP ATPIII criteria and/or on lipid-regulating medication; cElevated HbA1c: according to CDC criteria and/or on diabetes medication
